# Supplementary material for: Production and Characterization of Medium-Sized and Short Antioxidant Peptides from Soy Flour-Simulated Gastrointestinal Hydrolysate
Source: MDPI journal article supplement (doi:10.3390/antiox10050734), 2021-05-06
Supplement: s1 [file s1]

**Table S6. MEDIUM-SIZED PEPTIDES (FRACTION 3) BIOACTIVITY PREDICTION BY PEPTIDERANKER**

| rank      | sequence                       |
|-----------|--------------------------------|
| 0.829165  | WQEQQDEDEDEDEDEDEQIPSHPPRRPSHG |
| 0.78413   | WQEQQDEDEDEDEDEDEQIPSHPPRRPS   |
| 0.597538  | HGGKGSEEEQDEREHPRPHQPH         |
| 0.475004  | QNQLDQMPR                      |
| 0.459632  | SGFEGDNMIER                    |
| 0.395137  | KPEDWDDKEFIPDPEDKKPEG          |
| 0.351856  | ENQLDQMPR                      |
| 0.323857  | HDKSSPSYHR                     |
| 0.316052  | KSQSDNFEYV                     |
| 0.273056  | PRPPHQKEER                     |
| 0.270425  | SAMPGHGTGQPTGH                 |
| 0.257461  | SPQLENLRD                      |
| 0.257193  | NALEPDHR                       |
| 0.249465  | EEFFGPGGRDPESV                 |
| 0.245269  | NNQLDQNPR                      |
| 0.239882  | HFNEGDVL                       |
| 0.234141  | NALKPDNR                       |
| 0.226605  | DRIYDYDV                       |
| 0.222875  | NNQLDQTPR                      |
| 0.210959  | HDKSSPSYH                      |
| 0.190933  | SEFEEINRV                      |
| 0.182809  | GKGGGIEVDSTGK                  |
| 0.172989  | KTNDRPSIGN                     |
| 0.171477  | KAADQIAGQT                     |
| 0.171255  | MELENLEERW                     |
| 0.167042  | RPSYTNGPQEI                    |
| 0.156414  | KTISSSEDPF                     |
| 0.155249  | VNPESQQGSPR                    |
| 0.144776  | ERIYDYDV                       |
| 0.142142  | SVVGGDGLPDTVEK                 |
| 0.135155  | GINAENNQRN                     |
| 0.133299  | NHGDQILDEANKA                  |
| 0.127302  | SYDTKFEEIN                     |
| 0.124885  | STGHVPSSGGESSA                 |
| 0.121697  | VVAEQAGEQGFE                   |
| 0.119904  | LEHGGIATDDDYP                  |
| 0.115885  | YGTNTADTGTGPR                  |
| 0.115207  | LAASAGETAKE                    |
| 0.109199  | RQNIGQNSSPDI                   |
| 0.108575  | RAELSEDDVFV                    |
| 0.101717  | NEGEANIEL                      |
| 0.0960369 | KLQGENEEEEKGAIVT               |
| 0.0960217 | TSVGHMPSTKEEGH                 |
| 0.0936312 | GHGHHTTGTGTGTAT                |
| 0.09185   | KESDITAGKDTPQGSIEA             |

0.0897102 KEDVKVEVEDGRV  
0.0875467 EKLQDIASEAGQ  
0.0854157 GLVSESETEKI  
0.0849549 DLTEDDLIEK  
0.0847615 IKETVVGKDDDDDDHGDGH  
0.0838137 NTNEDIAEKL  
0.0837387 HNIGQTSSPD  
0.0809551 GEEEEQRQQEGVIVEL  
0.0798314 DTKFEEIN  
0.079601 KIEAEGTQSGTPK  
0.0770362 RHNIGQTSSPD  
0.0763415 EITPEKNPQ  
0.072587 RNLQGENEEEDSGAIV  
0.0713902 KHHDVTVKDEK  
0.0699062 KVDEYGNVEK  
0.0659821 KEEVKVEVEDGRV  
0.0525346 QKIMENQSEELEEK  
0.0518491 TLVNNDDRDS  
0.0453637 KIMENQSEELEEK  
0.0443023 QKIMENQSEELEEKQ  
0.0441246 IMENQSEELEEK
